# Supplementary material
Source: Springer Nature journal article supplement (https://www.springermedizin.de/resource/supplementary/12913_2012_2487_MOESM1_ESM.pdf/9532064)

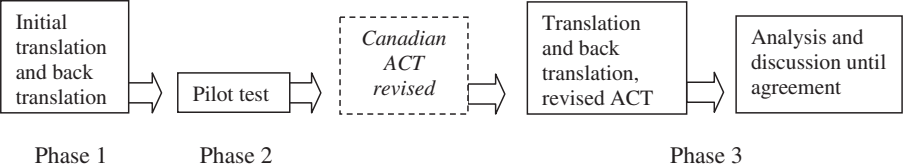

Supplement: MOESM1 [file 9532064]
